# Supplementary material for: Use of Smartphone Apps, Social Media, and Web-Based Resources to Support Mental Health and Well-Being: Online Survey
Source: PubMed Central journal article supplement (PMC6659390; doi:10.2196/12546), 2019-07-12
Supplement: mental_v6i7e12546_app1.pdf [file mental_v6i7e12546_app1.pdf]

## Multimedia Appendix 1

### Supporting mental health with apps: usage trends

| <b>Have you ever used apps to help you support your mental wellbeing, e.g. to reduce stress, help with your depression and/or anxiety, or track your mood?</b> | <b>N=102<br/>n (%)</b> |
|----------------------------------------------------------------------------------------------------------------------------------------------------------------|------------------------|
| Yes                                                                                                                                                            | 63 (61.8)              |
| No                                                                                                                                                             | 39 (38.2)              |

| <b>Details of use of apps</b>                                                                          | <b>N=63<br/>n (%)</b> |
|--------------------------------------------------------------------------------------------------------|-----------------------|
| <b><i>How did you find the app?</i></b>                                                                |                       |
| Found it on the internet                                                                               | 17 (27)               |
| Found it in the app store                                                                              | 20 (32)               |
| It was recommended by an app store                                                                     | 1 (2)                 |
| It was recommended by someone I know                                                                   | 20 (32)               |
| It was recommended by a therapist, counsellor or health professional                                   | 4 (6)                 |
| It was mentioned in an article I read                                                                  | 11 (18)               |
| It was mentioned on social media                                                                       | 8 (13)                |
| Other                                                                                                  | 2 (3)                 |
| <b><i>How frequently do you / did you use the app?<sup>a</sup></i></b>                                 |                       |
| Multiple times per day                                                                                 | 3 (5)                 |
| Once a day                                                                                             | 17 (27)               |
| Multiple times per week                                                                                | 14 (22)               |
| Once a week                                                                                            | 9 (14)                |
| Multiple times per month                                                                               | 1 (2)                 |
| Once a month                                                                                           | 1 (2)                 |
| Less often than once a month                                                                           | 2 (3)                 |
| Irregularly                                                                                            | 1 (2)                 |
| More often at first, less often now                                                                    | 4 (6)                 |
| Only when needed                                                                                       | 4 (6)                 |
| For a limited time                                                                                     | 7 (11)                |
| <b><i>How do you remember / what does make you use the app that often? (select all that apply)</i></b> |                       |
| I receive reminders from the app                                                                       | 20 (32)               |
| I have my own reminders (e.g. in a separate reminder app)                                              | 4 (6)                 |
| I receive notifications when I don't use the app for a while                                           | 4 (6)                 |
| It's a part of my daily routine                                                                        | 18 (29)               |
| I do it automatically                                                                                  | 8 (13)                |
| I do it in response to events or sensations (e.g. to stop a panic attack or reduce anxiety)            | 30 (48)               |
| Other                                                                                                  | 3 (5)                 |
| <b><i>For how long have you been using / did you use the app?</i></b>                                  |                       |
| 1 week or less                                                                                         | 2 (3)                 |
| 1-4 weeks                                                                                              | 7 (11)                |

|                                                                                         |         |
|-----------------------------------------------------------------------------------------|---------|
| 1-3 months                                                                              | 13 (21) |
| 3-6 months                                                                              | 18 (29) |
| 6-12 months                                                                             | 9 (14)  |
| Over 12 months                                                                          | 14 (22) |
| <b><i>Do you/did you share with anyone any information you recorded in the app?</i></b> |         |
| Yes                                                                                     | 7 (11)  |
| No                                                                                      | 56 (89) |

<sup>a</sup>It was an open-ended question. Answers were categories by the authors and grouped into the categories summarised in the table.

| <b>Data sharing</b>                                                                                             | <b>N=7<br/>n (%)</b> |
|-----------------------------------------------------------------------------------------------------------------|----------------------|
| <b><i>With whom do you / did you share the information you recorded in the app? (select all that apply)</i></b> |                      |
| With friends                                                                                                    | 5 (71)               |
| With family                                                                                                     | 1 (14)               |
| With partner                                                                                                    | 3 (43)               |
| With therapist, counsellor or health professional                                                               | 1 (14)               |
| Other                                                                                                           | 1 (14)               |

| <b>Continued use</b>                                                                                                | <b>N=63<br/>n (%)</b> |
|---------------------------------------------------------------------------------------------------------------------|-----------------------|
| <b><i>Do you still use the app?</i></b>                                                                             |                       |
| Yes                                                                                                                 | 41 (65)               |
| No                                                                                                                  | 22 (35)               |
| <b><i>Do you / did you use any other apps for supporting your mental wellbeing in the past couple of years?</i></b> |                       |
| Yes                                                                                                                 | 24 (38)               |
| No                                                                                                                  | 31 (49)               |
| I don't remember                                                                                                    | 8 (13)                |
| <b><i>Do you still use these other apps?</i></b>                                                                    |                       |
| Yes                                                                                                                 | 13 (21)               |
| No                                                                                                                  | 11 (18)               |

| <b><i>Why did you stop using the app? (select all that apply)</i></b> | <b>N=22<br/>n (%)</b> |
|-----------------------------------------------------------------------|-----------------------|
| I don't need it anymore                                               | 4 (18)                |
| It didn't have features I needed                                      | 2 (9)                 |
| I found a better app                                                  | 0 (0)                 |
| I found a better/different way of supporting my mental wellbeing      | 6 (27)                |
| I got bored                                                           | 8 (36)                |
| Other                                                                 | 5 (23)                |

| <b><i>Why did you stop using the other apps? (select all that apply)</i></b> | <b>N=11<br/>n (%)</b> |
|------------------------------------------------------------------------------|-----------------------|
| I don't need it anymore                                                      | 3 (27)                |
| It didn't have features I needed                                             | 4 (36)                |
| I found a better app                                                         | 1 (9)                 |
| I found a better/different way of supporting my mental wellbeing             | 3 (27)                |
| I got bored                                                                  | 4 (36)                |
| Other                                                                        | 4 (36)                |
