# Supplementary material for: Use of Smartphone Apps, Social Media, and Web-Based Resources to Support Mental Health and Well-Being: Online Survey
Source: PubMed Central journal article supplement (PMC6659390; doi:10.2196/12546), 2019-07-12
Supplement: mental_v6i7e12546_app2.pdf [file mental_v6i7e12546_app2.pdf]

## Multimedia Appendix 2

### Supporting mental health with social media and discussion forums: usage trends

| <b>Have you ever used any discussion forums or online social networks to support your mental wellbeing, e.g. to ask for advice or discuss any issues?</b> | <b>N=102<br/>n (%)</b> |
|-----------------------------------------------------------------------------------------------------------------------------------------------------------|------------------------|
| Yes                                                                                                                                                       | 38 (37.3)              |
| No                                                                                                                                                        | 64 (62.7)              |

| <b>Details of use of social media and discussion forums</b>                                           | <b>N=38<br/>n (%)</b> |
|-------------------------------------------------------------------------------------------------------|-----------------------|
| <b><i>On what device or devices do you access this site? (select all that apply)</i></b>              |                       |
| On my phone                                                                                           | 24 (63)               |
| On my tablet                                                                                          | 8 (21)                |
| On a shared tablet                                                                                    | 0 (0)                 |
| On my PC / laptop                                                                                     | 26 (68)               |
| On a shared PC / laptop                                                                               | 0 (0)                 |
| On a work machine                                                                                     | 6 (16)                |
| On a public machine (e.g. in a library)                                                               | 0 (0)                 |
| Other                                                                                                 | 0 (0)                 |
| <b><i>How do you / did you access this site?</i></b>                                                  |                       |
| Through a web browser                                                                                 | 31 (82)               |
| Through an app                                                                                        | 12 (32)               |
| Other                                                                                                 | 2 (5)                 |
| <b><i>Who contributes to this discussion forum / social network? (select all that apply)</i></b>      |                       |
| People I know offline                                                                                 | 6 (16)                |
| Anonymous strangers                                                                                   | 29 (76)               |
| Strangers who use their real names                                                                    | 13 (34)               |
| Experts (e.g. coaches, therapists, trainers)                                                          | 4 (11)                |
| Health professionals                                                                                  | 6 (16)                |
| I don't know if any experts or health professionals are involved                                      | 8 (21)                |
| Other                                                                                                 | 1 (3)                 |
| <b><i>How frequently do you / did you use this discussion forum / social network?<sup>a</sup></i></b> |                       |
| Multiple times per day                                                                                | 2 (5)                 |
| Once a day                                                                                            | 9 (24)                |
| Multiple times per week                                                                               | 4 (11)                |
| Once a week                                                                                           | 3 (8)                 |
| Multiple times per month                                                                              | 1 (3)                 |
| Once a month                                                                                          | 3 (8)                 |
| Less often than once a month                                                                          | 4 (11)                |
| More often at first, less often now                                                                   | 1 (3)                 |
| Only when needed                                                                                      | 6 (16)                |
| For a limited time                                                                                    | 5 (13)                |

| <b><i>How do you remember / what does make you visit this site that often? (select all that apply)</i></b> |         |
|------------------------------------------------------------------------------------------------------------|---------|
| I visit it regularly anyway, for reasons not related to mental wellbeing support                           | 11 (29) |
| I visit it when I have a question or want to discuss something                                             | 17 (45) |
| I receive reminders from the site                                                                          | 1 (3)   |
| I have my own reminders (e.g. in a separate reminder app)                                                  | 0 (0)   |
| I receive notifications when I don't use the site for a while                                              | 0 (0)   |
| It's a part of my daily routine                                                                            | 8 (21)  |
| I do it automatically                                                                                      | 9 (24)  |
| I do it in response to events or sensations (e.g. to stop a panic attack or reduce anxiety)                | 16 (42) |
| Other                                                                                                      | 7 (18)  |
| <b><i>For how long have you been using / did you use the app?</i></b>                                      |         |
| 1 week or less                                                                                             | 3 (8)   |
| 1-4 weeks                                                                                                  | 3 (8)   |
| 1-3 months                                                                                                 | 4 (11)  |
| 3-6 months                                                                                                 | 6 (16)  |
| 6-12 months                                                                                                | 7 (18)  |
| Over 12 months                                                                                             | 15 (40) |

<sup>a</sup>It was an open-ended question. Answers were categories by the authors and grouped into the categories summarised in the table.

| <b>Continued use</b>                                                                                            | <b>N=38<br/>n (%)</b> |
|-----------------------------------------------------------------------------------------------------------------|-----------------------|
| <b><i>Do you still visit this social media site / discussion forum?</i></b>                                     |                       |
| Yes                                                                                                             | 25 (66)               |
| No                                                                                                              | 13 (34)               |
| <b><i>Do you / did you use other discussion forums or social networks to support your mental wellbeing?</i></b> |                       |
| Yes                                                                                                             | 6 (16)                |
| No                                                                                                              | 29 (76)               |
| I don't remember                                                                                                | 3 (8)                 |

| <b><i>Why did you stop visiting this site? (select all that apply)</i></b> | <b>N=13<br/>n (%)</b> |
|----------------------------------------------------------------------------|-----------------------|
| I don't need it anymore                                                    | 6 (46)                |
| I found a better/different way of supporting my mental wellbeing           | 2 (15)                |
| I got bored                                                                | 1 (8)                 |
| Other                                                                      | 4 (31)                |

| <b><i>Do you still visit these other social media sites or discussion forums?</i></b> | <b>N=6<br/>n (%)</b> |
|---------------------------------------------------------------------------------------|----------------------|
| Yes                                                                                   | 4 (67)               |
| No                                                                                    | 2 (33)               |

| <b><i>Why did you stop using the other sites? (select all that apply)</i></b> | <b>N=2<br/>n (%)</b> |
|-------------------------------------------------------------------------------|----------------------|
| I don't need it anymore                                                       | 0 (0)                |
| I found a better/different way of supporting my mental wellbeing              | 1 (50)               |
| I got bored                                                                   | 0 (0)                |
| Other                                                                         | 2 (100)              |
