# Supplementary material for: Use of Smartphone Apps, Social Media, and Web-Based Resources to Support Mental Health and Well-Being: Online Survey
Source: PubMed Central journal article supplement (PMC6659390; doi:10.2196/12546), 2019-07-12
Supplement: mental_v6i7e12546_app3.pdf [file mental_v6i7e12546_app3.pdf]

## Multimedia Appendix 3

### Supporting mental health with websites and Web-based programs: usage trends

| <b>Have you ever used websites or Web-based programs to help you support your mental wellbeing, e.g. to help you deal with stress, anxiety or depression?</b> | <b>N=102<br/>n (%)</b> |
|---------------------------------------------------------------------------------------------------------------------------------------------------------------|------------------------|
| Yes                                                                                                                                                           | 28 (27.5)              |
| No                                                                                                                                                            | 74 (72.5)              |

| <b>Details of use of websites and Web-based programs</b>                                                   | <b>N=28<br/>n (%)</b> |
|------------------------------------------------------------------------------------------------------------|-----------------------|
| <b><i>Why did you decide to use this website or Web-based program? (select all that apply)</i></b>         |                       |
| To find out how to deal with stress, anxiety, etc. on a day-to-day basis                                   | 20 (71)               |
| To develop specific skills or strategies                                                                   | 13 (46)               |
| Out of curiosity                                                                                           | 9 (32)                |
| Because a friend or a family member suggested I should try it                                              | 7 (25)                |
| Because it was recommended to me by a GP or another healthcare professional                                | 6 (21)                |
| As part of professional development                                                                        | 4 (14)                |
| Other                                                                                                      | 1 (4)                 |
| <b><i>How frequently do you / did you visit this website or Web-based program?<sup>a</sup></i></b>         |                       |
| Multiple times per day                                                                                     | 0 (0)                 |
| Once a day                                                                                                 | 5 (18)                |
| Multiple times per week                                                                                    | 1 (4)                 |
| Once a week                                                                                                | 1 (4)                 |
| Multiple times per month                                                                                   | 0 (0)                 |
| Once a month                                                                                               | 3 (11)                |
| Less often than once a month                                                                               | 5 (18)                |
| Irregularly                                                                                                | 3 (11)                |
| More often at first, less often now                                                                        | 0 (0)                 |
| Only when needed                                                                                           | 2 (7)                 |
| For a limited time                                                                                         | 8 (29)                |
| <b><i>How do you remember / what does make you visit this site that often? (select all that apply)</i></b> |                       |
| I get notifications when I don't use the site for a while                                                  | 3 (11)                |
| It's a part of my daily routine                                                                            | 5 (18)                |
| I do it automatically                                                                                      | 2 (7)                 |
| I do it in response to events or sensations (e.g. to stop panic attack or reduce anxiety)                  | 13 (46)               |
| Other                                                                                                      | 9 (32)                |
| <b><i>For how long have you been using / did you use the site?</i></b>                                     |                       |
| 1 week or less                                                                                             | 7 (25)                |

|                                                                                                    |         |
|----------------------------------------------------------------------------------------------------|---------|
| 1-4 weeks                                                                                          | 5 (18)  |
| 1-3 months                                                                                         | 1 (4)   |
| 3-6 months                                                                                         | 2 (7)   |
| 6-12 months                                                                                        | 4 (14)  |
| Over 12 months                                                                                     | 9 (32)  |
| <b><i>On what device or devices do you / did you access this site? (select all that apply)</i></b> |         |
| On my phone                                                                                        | 16 (57) |
| On my tablet                                                                                       | 5 (18)  |
| On a shared tablet                                                                                 | 0 (0)   |
| On my PC / laptop                                                                                  | 16 (57) |
| On a shared PC / laptop                                                                            | 0 (0)   |
| On a work machine                                                                                  | 2 (7)   |
| On a public machine (e.g. in a library)                                                            | 0 (0)   |
| Other                                                                                              | 0 (0)   |
| <b><i>Does this site have a companion app?</i></b>                                                 |         |
| Yes                                                                                                | 6 (21)  |
| No                                                                                                 | 4 (14)  |
| I don't know                                                                                       | 18 (64) |

<sup>a</sup>It was an open-ended question. Answers were categories by the authors and grouped into the categories summarised in the table.

|                                             |                      |
|---------------------------------------------|----------------------|
| <b><i>Do you use the companion app?</i></b> | <b>N=6<br/>n (%)</b> |
| Yes                                         | 4 (67)               |
| No                                          | 2 (33)               |

|                                                                    |                       |
|--------------------------------------------------------------------|-----------------------|
| <b>Continued use</b>                                               | <b>N=28<br/>n (%)</b> |
| <b><i>Do you still visit this website / Web-based program?</i></b> |                       |
| Yes                                                                | 13 (46)               |
| No                                                                 | 15 (54)               |

|                                                                                                |                       |
|------------------------------------------------------------------------------------------------|-----------------------|
| <b><i>Why did you stop using this website / Web-based program? (select all that apply)</i></b> | <b>N=15<br/>n (%)</b> |
| I don't need it anymore                                                                        | 4 (27)                |
| I completed the program                                                                        | 2 (13)                |
| I found a better/different way of supporting my mental wellbeing                               | 7 (47)                |
| I got bored                                                                                    | 3 (20)                |
| Other                                                                                          | 3 (20)                |

|                                                                                                               |                       |
|---------------------------------------------------------------------------------------------------------------|-----------------------|
| <b><i>Do you / did you use any other websites or Web-based programs to support your mental wellbeing?</i></b> | <b>N=28<br/>n (%)</b> |
| Yes                                                                                                           | 5 (18)                |
| No                                                                                                            | 16 (57)               |

|                  |        |
|------------------|--------|
| I don't remember | 7 (25) |
|------------------|--------|

| <i>Do you still visit these other websites or Web-based programs ?</i> | <b>N=5<br/>n (%)</b> |
|------------------------------------------------------------------------|----------------------|
| Yes                                                                    | 3 (60)               |
| No                                                                     | 2 (40)               |

| <i>Why did you stop using those websites or Web-based programs ? (select all that apply)</i> | <b>N=2<br/>n (%)</b> |
|----------------------------------------------------------------------------------------------|----------------------|
| I don't need it anymore                                                                      | 1 (50)               |
| I completed the program                                                                      | 1 (50)               |
| I found a better/different way of supporting my mental wellbeing                             | 0 (0)                |
| I got bored                                                                                  | 0 (0)                |
| Other                                                                                        | 0 (0)                |
